# Supplementary material
Source: PubMed Central journal article supplement (PMC8385244)
Supplement: mmc1.pdf [file mmc1.pdf]

**Supplemental information**

**Sputnik V vaccine elicits seroconversion  
and neutralizing capacity to SARS-CoV-2  
after a single dose**

**Andres H. Rossi, Diego S. Ojeda, Augusto Varese, Lautaro Sanchez, Maria M. Gonzalez Lopez Ledesma, Ignacio Mazzitelli, Anabel Alvarez Juliá, Santiago Oviedo Rouco, Horacio M. Pallarés, Guadalupe S. Costa Navarro, Natali B. Rasetto, Corina I. Garcia, Shirley D. Wenker, Lila Y. Ramis, Magalí G. Bialer, Maria Jose de Leone, C. Esteban Hernando, Santiago Sosa, Luciana Bianchimano, Antonella S. Rios, Maria Soledad Treffinger Cienfuegos, Julio J. Caramelo, Yesica Longueira, Natalia Laufer, Diego E. Alvarez, Jorge Carradori, Dariana Pedrozza, Alejandra Rima, Cecilia Echeгойen, Regina Ercole, Paula Gelpi, Susana Marchetti, Martín Zubieta, Guillermo Docena, Nicolas Kreplak, Marcelo Yanovsky, Jorge Geffner, Marina Pifano, and Andrea V. Gamarnik**

Supplemental information

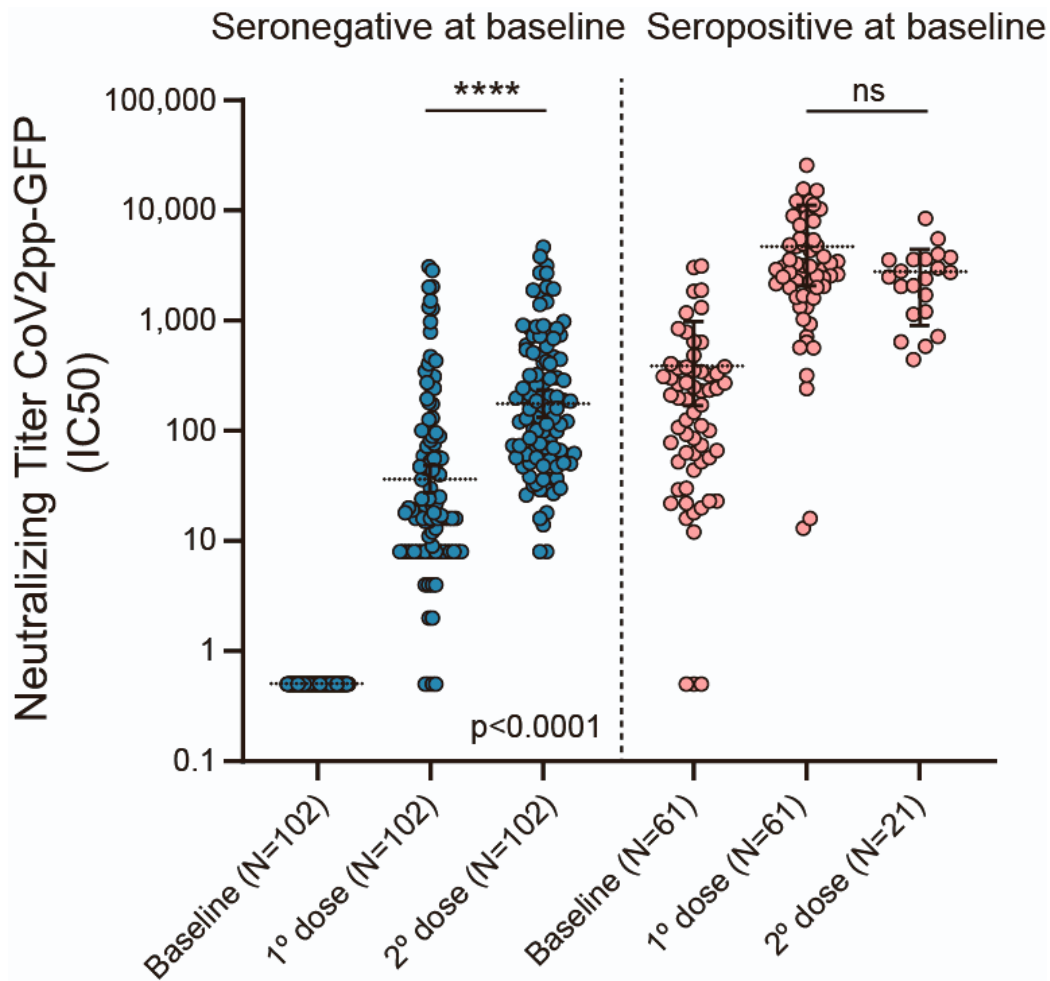

**Figure S1 Neutralizing capacity with and without prior SARS-CoV-2 infection after one and two doses of Sputnik V vaccine.** Neutralizing titers were measured by 50% inhibition for the pseudotyped virus (CoV2pp-GFP) in 232 participants. Titters at baseline, and 21 days after 1 or 2 doses from individuals that were seronegative or seropositive at baseline are shown. Geometric means with 95% confidence intervals are shown in dash lines. The Mann-Whitney  $U$  test was used to compare at various time points antibody titers. Statistical significance is shown with the following notations: \*\*\*\*: $p < 0.0001$ ; ns: not significant. Related to Figure 2.
